# Supplementary material for: Photothermal catalytic CO2 oxidative dehydrogenation of propane to propylene over BiOX (X = Cl, Br, I) nanocatalysts
Source: Royal Society of Chemistry journal article supplement (doi:10.1039/d2gc02571j), 2022-01-01
Supplement: d2gc02571j1.pdf [file d2gc02571j1.pdf]

***Supporting information for***

Photothermal catalytic CO<sub>2</sub> oxidation dehydrogenation of propane to propylene  
over BiOX (X = Cl, Br, I) nanocatalysts

Zhen-Hong He,<sup>a,\*</sup> Bao-Ting Wu,<sup>a</sup> Zhong-Yu Wang,<sup>a</sup> Shao-Yan Yang,<sup>b</sup> Kuan Wang,<sup>a</sup> Jiao-Jiao  
Shi,<sup>a</sup> Meng-Xin He,<sup>a</sup> Weitao Wang,<sup>a</sup> Zhao-Tie Liu<sup>a,b,\*</sup>

*<sup>a</sup>Shaanxi Key Laboratory of Chemical Additives for Industry, College of Chemistry and  
Chemical Engineering, Shaanxi University of Science & Technology, Xi'an, 710021, China*

*<sup>b</sup>School of Chemistry & Chemical Engineering, Shaanxi Normal University, Xi'an, 710119,  
China*

Corresponding authors: [hezhenhong@sust.edu.cn](mailto:hezhenhong@sust.edu.cn) (Z.-H. He), [ztliu@snnu.edu.cn](mailto:ztliu@snnu.edu.cn) (Z.-T. Liu)

**Table S1** Photothermal catalytic CO<sub>2</sub>-ODHP over different photocatalysts

| Entry | Catalyst                                                     | Conv.<br>(%) | Activity ( $\mu\text{mol}\cdot\text{g}_{\text{cat}}^{-1}\cdot\text{h}^{-1}$ ) |                             |                               |                             |       | C <sub>3</sub> H <sub>6</sub> Sele. <sup>c</sup><br>(%) |
|-------|--------------------------------------------------------------|--------------|-------------------------------------------------------------------------------|-----------------------------|-------------------------------|-----------------------------|-------|---------------------------------------------------------|
|       |                                                              |              | CH <sub>4</sub>                                                               | C <sub>2</sub> <sup>a</sup> | C <sub>3</sub> H <sub>6</sub> | C <sub>4</sub> <sup>b</sup> | CO    |                                                         |
| 1     | None                                                         | <0.1         | 0.4                                                                           | 0.4                         | 5.6                           | 2.4                         | 0.2   | 60.9                                                    |
| 2     | TiO <sub>2</sub> <sup>d</sup>                                | 0.1          | 0.4                                                                           | 0.7                         | 26.4                          | 14.6                        | 202.4 | 56.8                                                    |
| 3     | BN                                                           | 0.1          | 0.3                                                                           | 0.7                         | 20.8                          | 12.8                        | 19.8  | 54.2                                                    |
| 4     | g-C <sub>3</sub> N <sub>4</sub>                              | 0.1          | 0.7                                                                           | 0.3                         | 9.4                           | 13.9                        | 32.2  | 33.1                                                    |
| 5     | Co <sub>7</sub> Cu <sub>1</sub> Mn <sub>1</sub> <sup>e</sup> | 0.1          | 4.6                                                                           | 2.2                         | 22.2                          | 11.5                        | 16.6  | 54.6                                                    |
| 6     | GaN                                                          | 0.1          | 3.6                                                                           | 0.2                         | 9.6                           | 13.3                        | 18.3  | 33.4                                                    |
| 7     | Bi                                                           | 0.2          | 0.6                                                                           | 2.8                         | 80.8                          | 8.0                         | 24.9  | 86.4                                                    |
| 8     | Bi <sub>2</sub> O <sub>3</sub>                               | 0.1          | 0.5                                                                           | 0.2                         | 47.9                          | 9.3                         | 52.6  | 79.0                                                    |
| 9     | BiOCl nanosheets                                             | 0.1          | 1.2                                                                           | 0.7                         | 25.0                          | 8.5                         | 10.0  | 67.2                                                    |
| 10    | BiOBr nanosheets                                             | 0.1          | 1.6                                                                           | 1.6                         | 38.9                          | 8.8                         | 13.9  | 74.5                                                    |
| 11    | BiOI nanosheets                                              | 0.7          | 3.6                                                                           | 11.6                        | 282.6                         | 20.4                        | 525.2 | 89.0                                                    |
| 12    | BiOI nanoflowers                                             | 0.2          | 1.8                                                                           | 2.6                         | 75.6                          | 13.1                        | 31.9  | 79.2                                                    |
| 13    | BiI <sub>3</sub>                                             | <0.1         | 0.3                                                                           | 0.1                         | 1.3                           | 7.4                         | 20.3  | 11.5                                                    |
| 14    | Bi <sub>2</sub> S <sub>3</sub>                               | 0.1          | 6.9                                                                           | 0.2                         | 21.1                          | 8.2                         | 76.5  | 61.2                                                    |
| 15    | Bi <sub>2</sub> Fe <sub>4</sub> O <sub>9</sub>               | <0.1         | 1.0                                                                           | 0.4                         | 10.3                          | 6.7                         | 7.6   | 51.9                                                    |
| 16    | Bi <sub>2</sub> WO <sub>6</sub>                              | <0.1         | 2.2                                                                           | 0.5                         | 2.0                           | 9.5                         | 57.8  | 12.5                                                    |
| 17    | BiVO <sub>4</sub>                                            | 0.1          | 1.0                                                                           | 1.1                         | 32.4                          | 12.4                        | 80.9  | 64.9                                                    |
| 18    | Bi <sub>2</sub> MoO <sub>6</sub>                             | <0.1         | 1.2                                                                           | 0.2                         | 2.9                           | 13.8                        | 24.1  | 13.4                                                    |
| 19    | Bi <sub>12</sub> TiO <sub>20</sub>                           | 0.2          | 0.8                                                                           | 3.9                         | 65.2                          | 11.3                        | 45.2  | 78.5                                                    |
| 20    | BiOI nanosheets <sup>f</sup>                                 | -            | -                                                                             | -                           | -                             | -                           | 121.7 | -                                                       |
| 21    | BiOI nanosheets <sup>g</sup>                                 | -            | -                                                                             | -                           | -                             | -                           | 11.4  | -                                                       |
| 22    | KI                                                           | <0.1         | 0.6                                                                           | 0.4                         | 6.3                           | 1.3                         | 0.3   | 74.1                                                    |
| 23    | KI+H <sub>2</sub> O <sup>h</sup>                             | <0.1         | 0.9                                                                           | -                           | 5.9                           | -                           | 0.8   | 95.1                                                    |
| 24    | I <sub>2</sub>                                               | 0.5          | 1.8                                                                           | 28.3                        | 196.3                         | 7.7                         | 105.5 | 86.9                                                    |

|    |                                                    |     |     |      |       |      |       |      |
|----|----------------------------------------------------|-----|-----|------|-------|------|-------|------|
| 25 | BiOI nanosheets (UV,<br>300 - 420 nm) <sup>i</sup> | 0.4 | 2.1 | 8.9  | 167.4 | 10.2 | 361.7 | 89.2 |
| 26 | BiOI nanosheets<br>(420-1100 nm) <sup>j</sup>      | 0.2 | 0.9 | 14.8 | 69.2  | 9.5  | 130.1 | 75.2 |

<sup>a</sup>Mainly ethane and ethylene. <sup>b</sup>Including *n*-butane, isobutane, *n*-butene, and isobutylene. <sup>c</sup>The selectivity of C<sub>3</sub>H<sub>6</sub> in the total hydrocarbon products. <sup>d</sup>Prepared according to ref. 1. <sup>e</sup>Prepared according to ref. 2. Conditions: catalyst 30 mg, C<sub>3</sub>H<sub>8</sub>/CO<sub>2</sub> molar ratio 1/5, total volume 180 mL, 270 °C, 1 h, and full irradiation under 300 W Xe lamp, 621 mW·cm<sup>-2</sup>. <sup>f</sup>The reaction gases were 15 ml H<sub>2</sub>, 15 ml CO<sub>2</sub>, and 150 ml Ar. <sup>g</sup>The reaction gases were 15 ml CO<sub>2</sub> and 165 ml Ar. <sup>h</sup>2 mL of water were added. <sup>i</sup>The light intensity was 412 mW·cm<sup>-2</sup>. <sup>j</sup>The light intensity was 264 mW·cm<sup>-2</sup>.

## 2. GC spectra

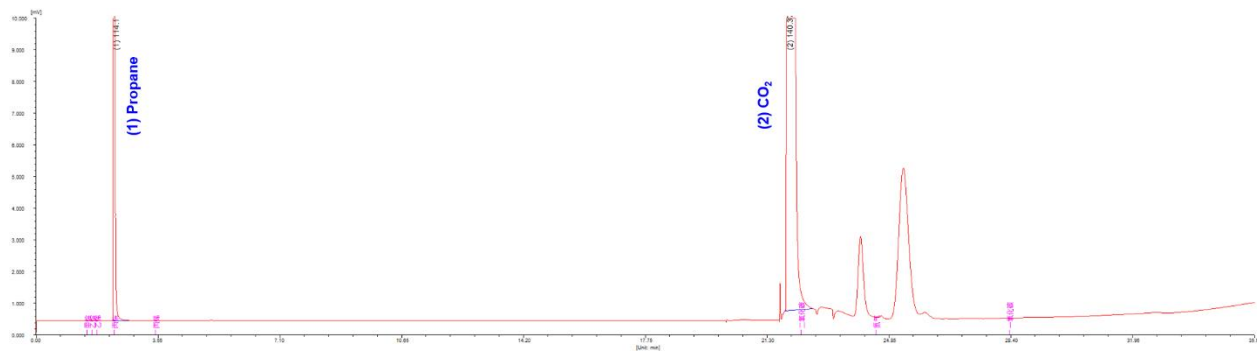

**Fig. S1** The GC spectrum of the reaction gas.

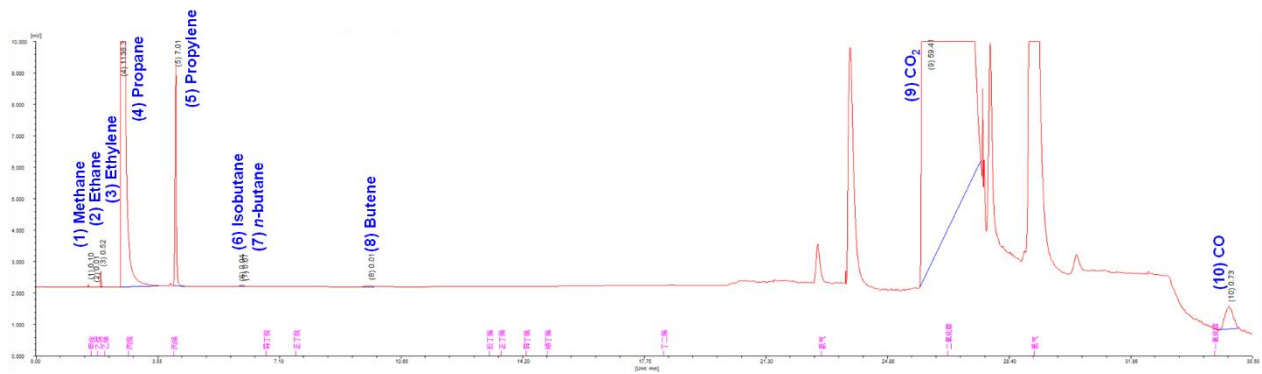

**Fig. S2** The GC spectrum of photothermal catalytic CO<sub>2</sub>-ODHP reaction over the BiOI nanosheets catalyst.

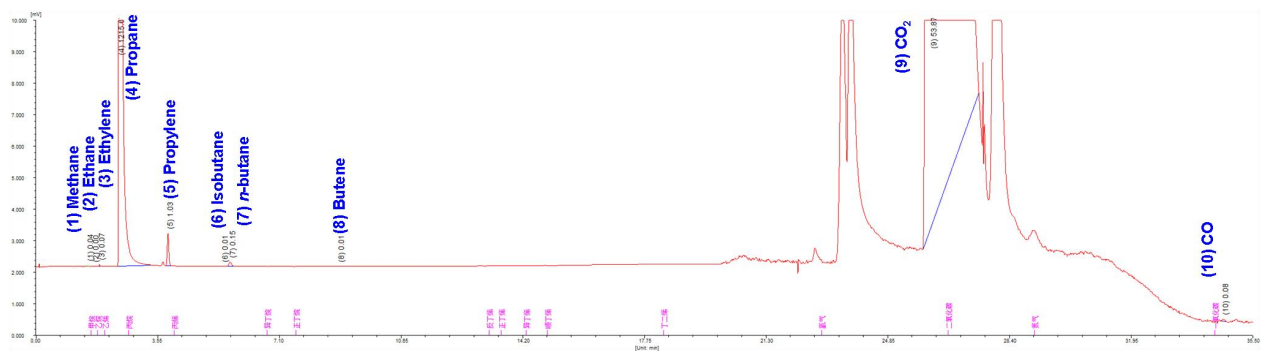

**Fig. S3** The GC spectrum of the photothermal catalytic CO<sub>2</sub>-ODHP reaction over the BiOI nanoflowers catalyst.

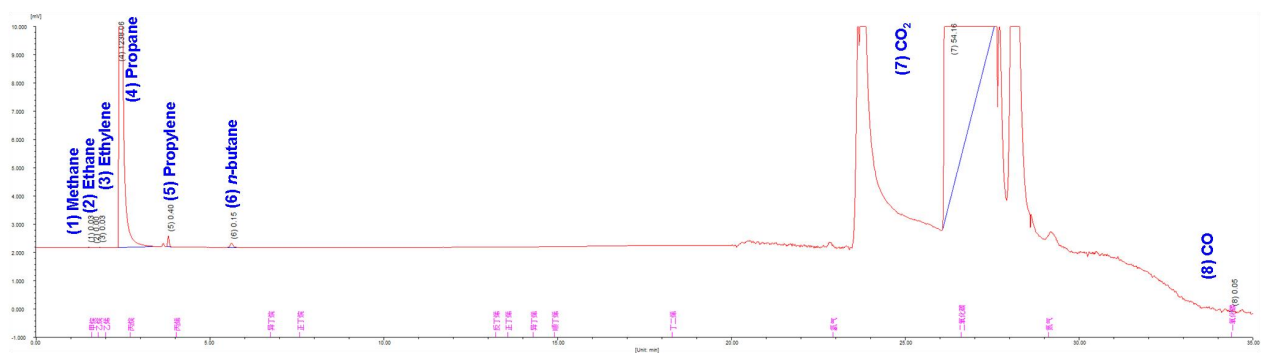

**Fig. S4** The GC spectrum of photothermal catalytic CO<sub>2</sub>-ODHP reaction over the BiOBr nanosheets catalyst.

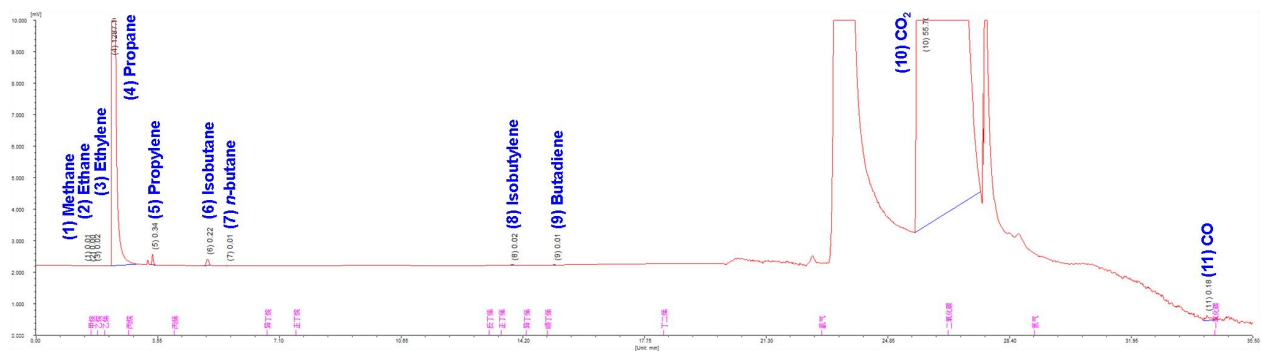

**Fig. S5** The GC spectrum of photothermal catalytic CO<sub>2</sub>-ODHP reaction over the BiOCl nanosheets catalyst.



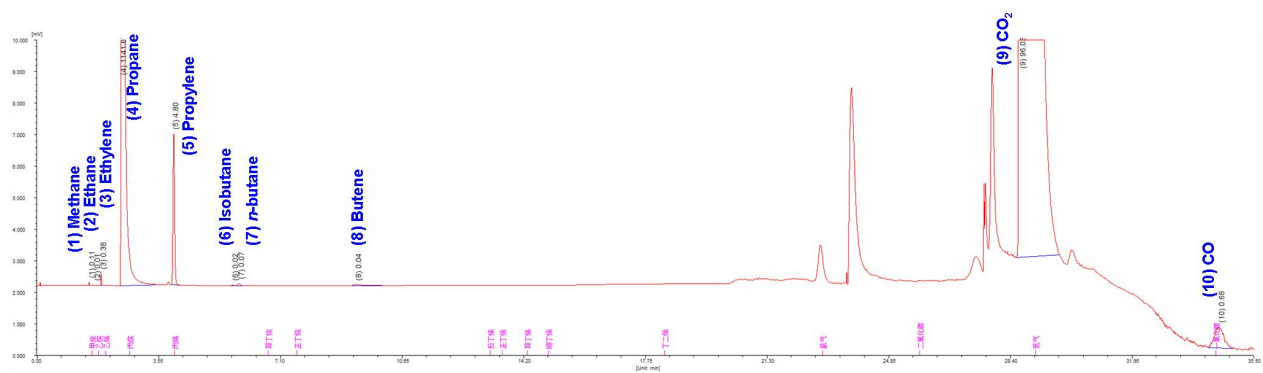

**Fig. S6.** The GC spectrum of photothermal catalytic DHP reaction over the BiOI nanosheets catalyst.

### 3. Pictures of the fresh BiOI nanosheets catalysts

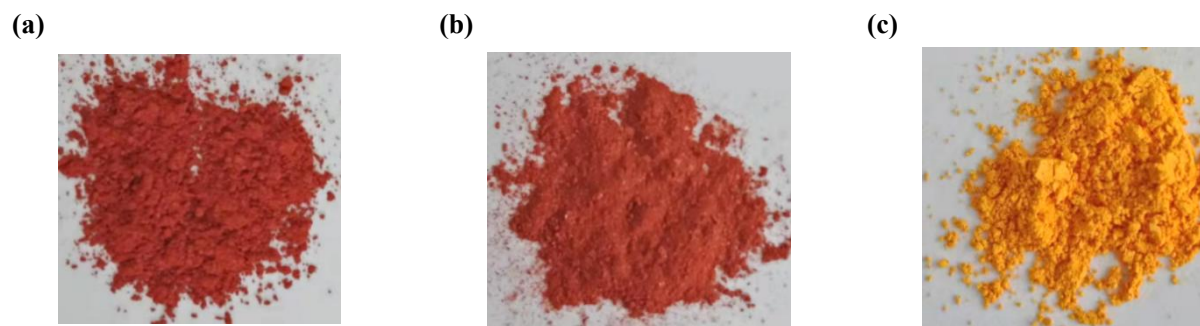

**Fig. S7.** Pictures of the fresh BiOI nanosheets catalyst (a), the used BiOI nanosheets catalyst (b), and the catalyst after calcination at 400 °C(c), respectively.

#### 4. XRD and XPS characterizations of the BiOI nanosheets catalyst after 13 runs

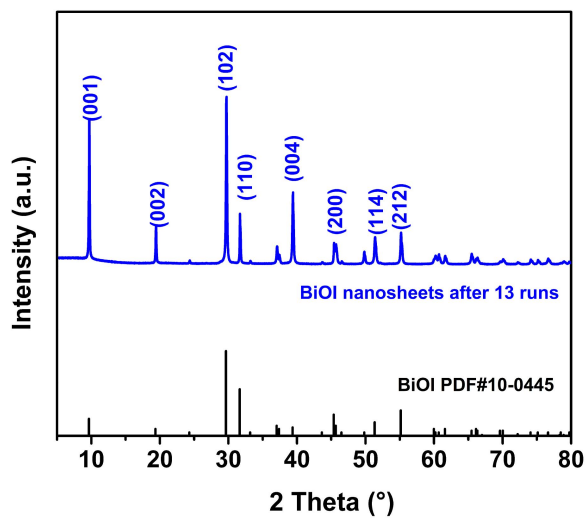

Fig. S8 XRD of the catalyst after 13 runs.

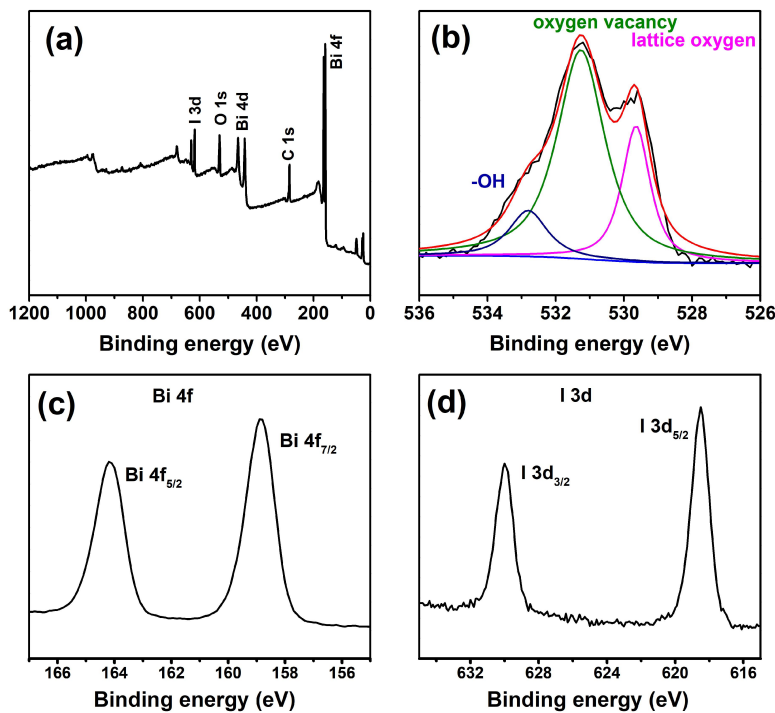

**Fig. S9** XPS spectra of the catalyst after 13 runs.

## References

- [1] J. Wang, K. Wang, Z.-H. He, S.-S. Li, R.-R. Zhang, P. Guo, W. Wang, Y. Yang, Z.-T. Liu, Solvent-induced synthesis of hierarchical TiO<sub>2</sub> nanoflowers with tunable morphology by monolayer self-assembly for probing the photocatalytic performance, *J. Nanostructure Chem.*, 2021, <https://doi.org/10.1007/s40097-021-00445-2>.
- [2] Z.-H. He, Z.-H. Li, Z.-Y. Wang, K. Wang, Y.-C. Sun, S.-W. Wang, W.-T. Wang, Y. Yang, Z.-T. Liu, Photothermal CO<sub>2</sub> hydrogenation to hydrocarbons over trimetallic Co-Cu-Mn catalysts, *Green Chem.*, 2021, 23, 5775-5785.
